# Supplementary material for: NMR Metabolomics and Chemometrics of Lettuce, Lactuca sativa L., under Different Foliar Organic Fertilization Treatments
Source: MDPI journal article supplement (doi:10.3390/plants11162164), 2022-08-20
Supplement: s1 [file s1]

# NMR Metabolomics and Chemometrics of Lettuce, *Lactuca sativa* L., under Different Foliar Organic Fertilization Treatments

Virginia Lanzotti <sup>1,\*</sup>, Attilio Anzano <sup>1</sup>, Laura Grauso <sup>1</sup>, Maurizio Zotti <sup>1</sup>, Adriana Sacco <sup>2</sup>, Mauro Senatore <sup>2</sup>, Mauro Moreno <sup>1</sup>, Marcello Diano <sup>3</sup>, Maddalena Parente <sup>3</sup>, Serena Esposito <sup>3</sup>, Pasquale Termolino <sup>4</sup>, Emanuela Palomba <sup>4</sup>, Astolfo Zoina <sup>1</sup> and Stefano Mazzoleni <sup>1,\*</sup>

<sup>1</sup> Dipartimento di Agraria, Università di Napoli Federico II, Via Università 100, 80055 Portici, Italy

<sup>2</sup> Institute for Sustainable Plant Protection (IPSP), National Research Council of Italy (CNR), 80055 Portici, Italy

<sup>3</sup> M2M Engineering sas, Business Innovation Center, Science Center, Via Coroglio, 80124 Naples, Italy

<sup>4</sup> Institute of Biosciences and Bioresources (IBBR), National Research Council of Italy (CNR), 80055 Portici, Italy

\* Correspondence: virginia.lanzotti@unina.it (V.L.); stefano.mazzoleni@unina.it (S.M.); Tel.: +39-0812539459 (V.L.); +39-0812532020 (S.M.)

## SUPPLEMENTARY MATERIAL

**Figure S1.** <sup>1</sup>H NMR spectra in triplicates of the *Lactuca sativa* leaves extracts treated with commercial compost tea (CT), Spirulina (SP), and Spirulina + *Fusarium* DNA (NAT). C indicates control plants. Spectra were registered in D<sub>2</sub>O at 600 MHz.

**Figure S2.** 2D COSY of the control plant registered in D<sub>2</sub>O at 600 MHz.

**Figure S3.** 2D HSQC of the control plant registered in D<sub>2</sub>O at 600 MHz.

**Figure S4.** 2D HSQC of the control plant registered in D<sub>2</sub>O at 600 MHz.

**Figure S5.** Principal Component Analysis (PCA) plots of first and second axis of all treatments and corresponding NMR spectral signals.

**Table S1.** Quantitative data (μmol/g dried leaves) of the detected metabolites in the analysed samples. AVG= average; SD= standard deviation

**Figure 1.**  $^1\text{H}$  NMR spectra in triplicates of the *Lactuca sativa* leaves extracts treated with commercial compost tea (CT), Spirulina (SP), and Spirulina + *Fusarium* DNA (NAT). C indicates control plants. Spectra were registered in  $\text{D}_2\text{O}$  at 600 MHz.

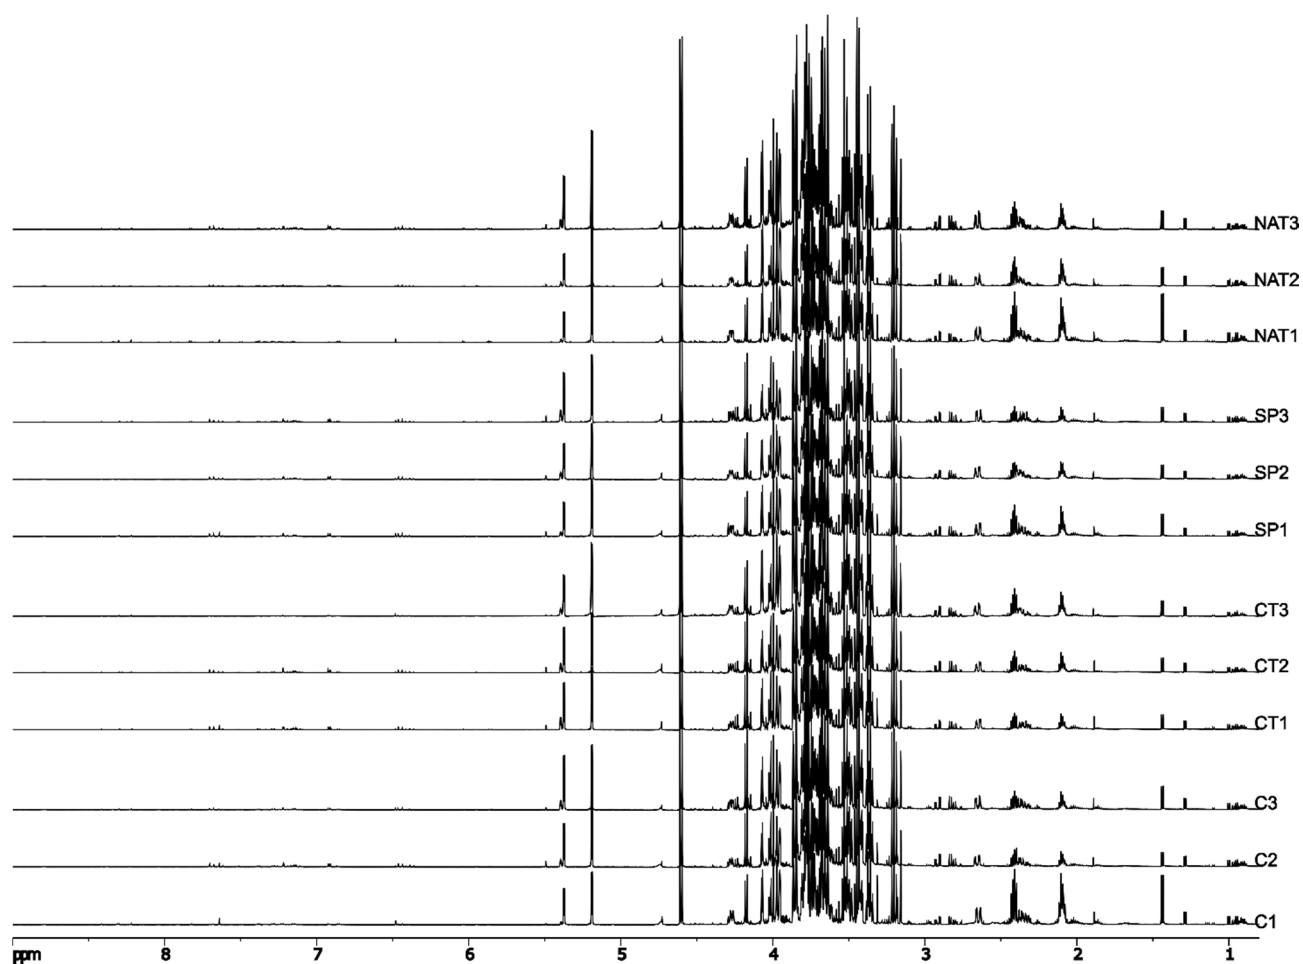

**Figure S2.** 2D COSY of the control plant registered in D<sub>2</sub>O at 600 MHz.

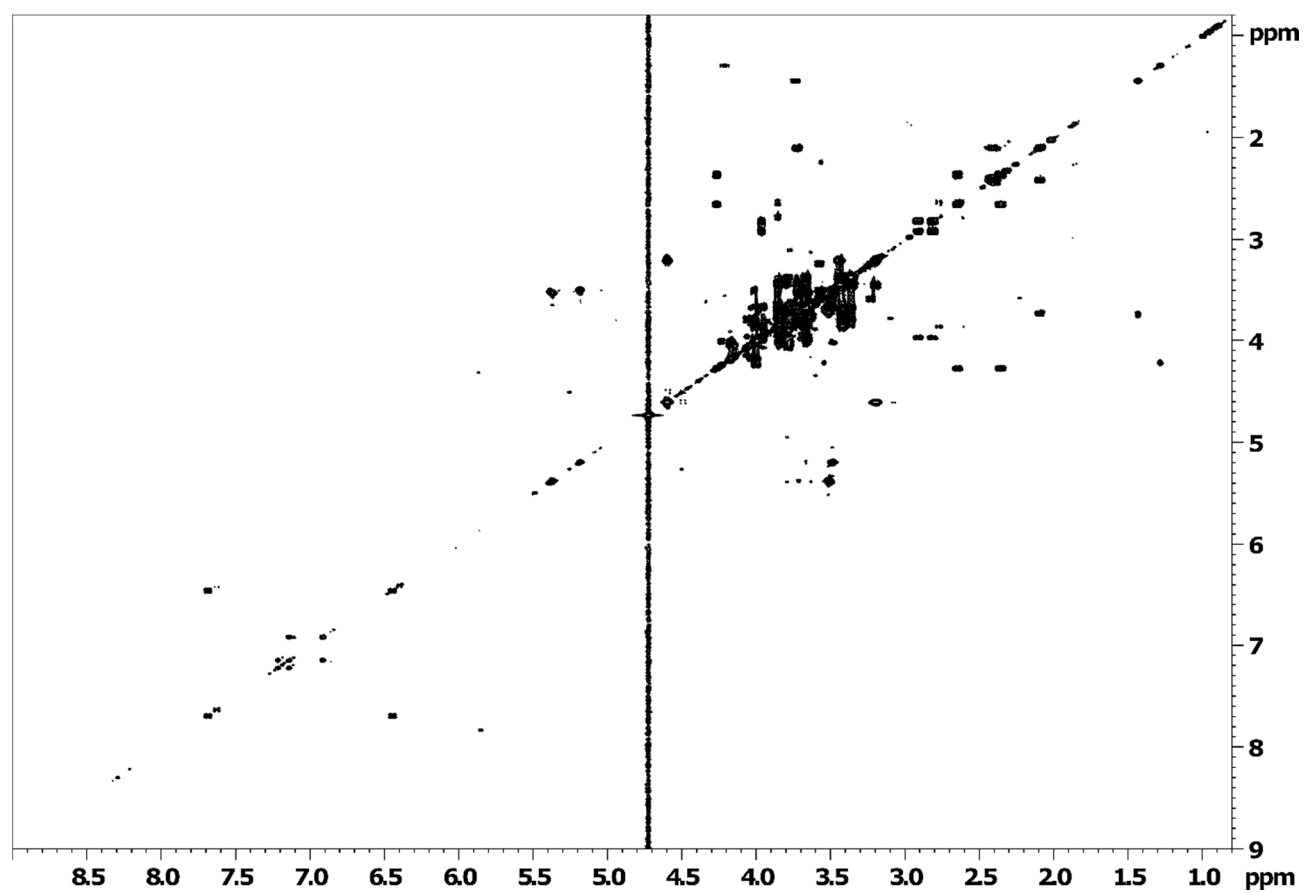

**Figure S3.** 2D HSQC of the control plant registered in D<sub>2</sub>O at 600 MHz.

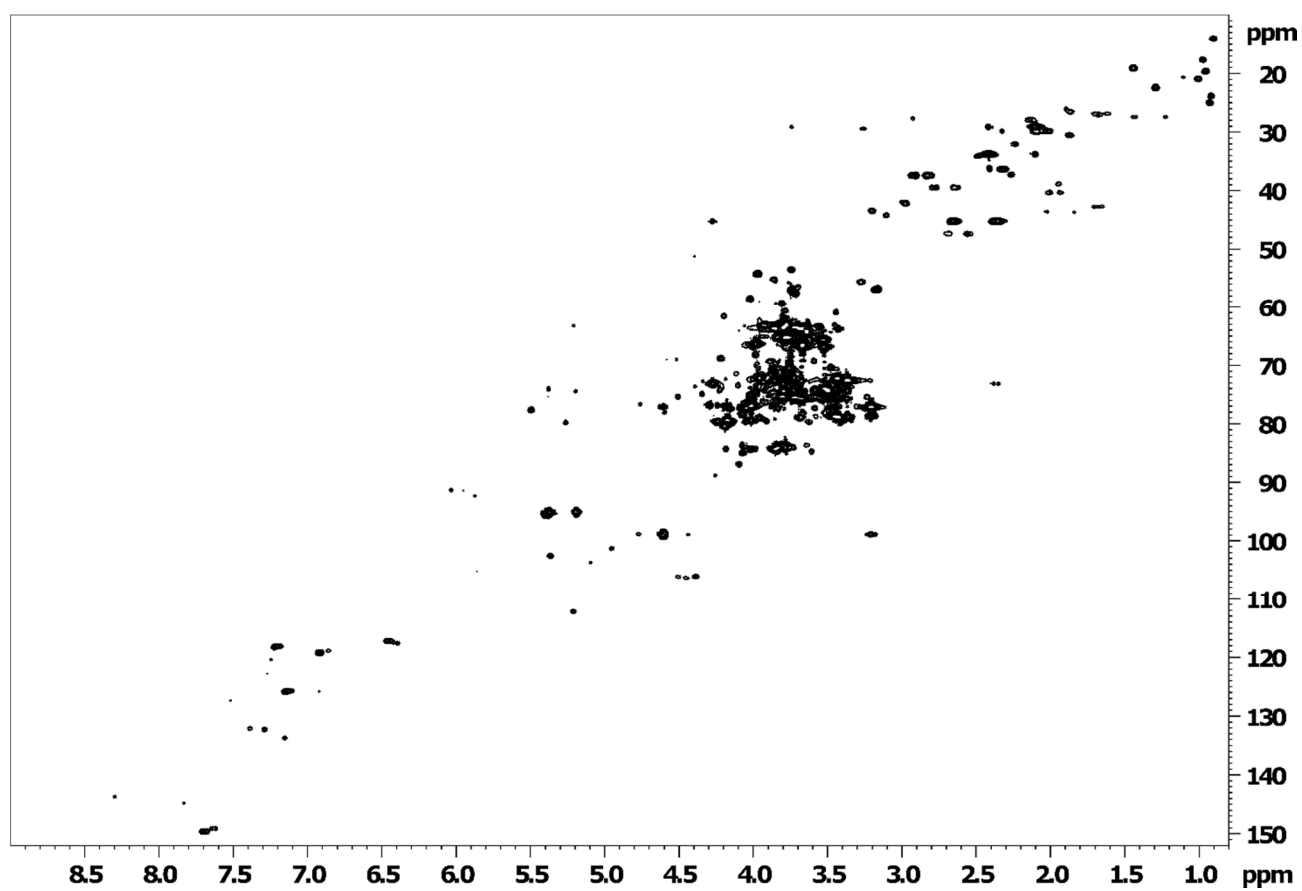

**Figure S4.** 2D HMBC of the control plant registered in D<sub>2</sub>O at 600 MHz.

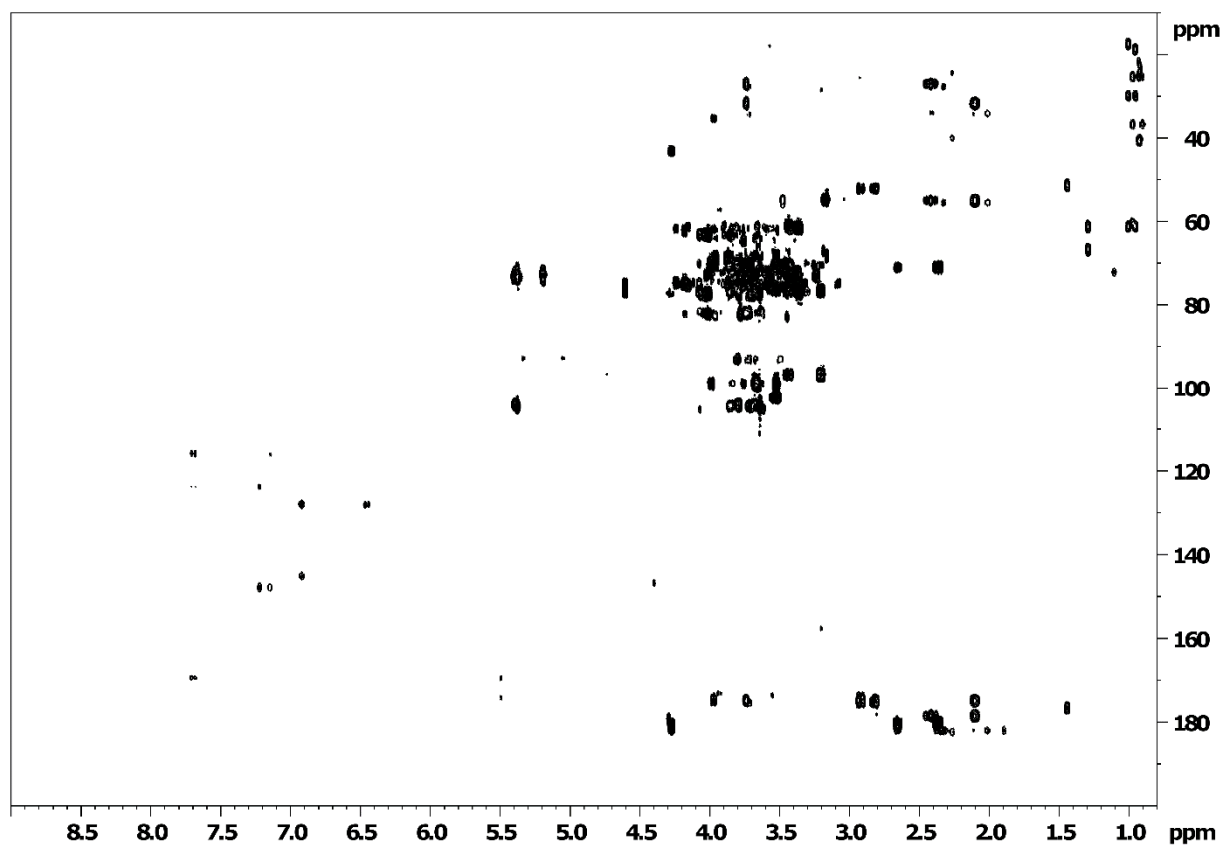

**Figure S5.** Principal Component Analysis (PCA) plots of first and second axis of all treatments and corresponding NMR spectral signals.

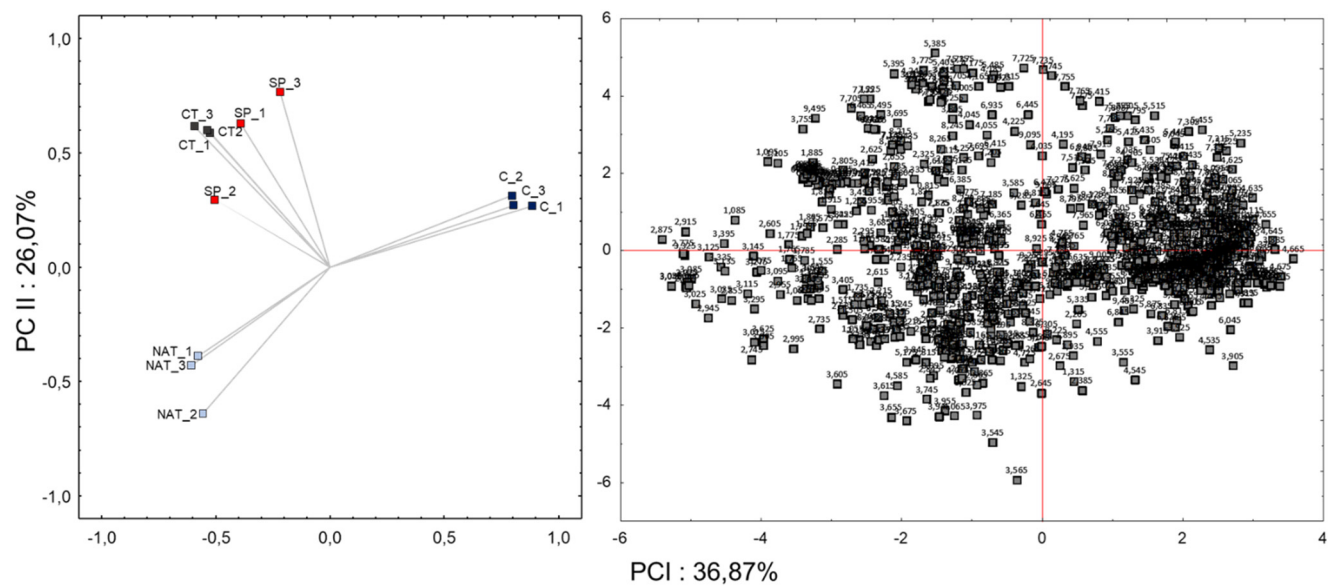

**Table S1.** Quantitative data ( $\mu\text{mol/g}$  dried leaves) of the detected metabolites in the analysed samples. AVG= average; SD= standard deviation

|                        | C                  | CT                  | SP                 | NAT                |
|------------------------|--------------------|---------------------|--------------------|--------------------|
| Compound               | AVG $\pm$ SD       | AVG $\pm$ SD        | AVG $\pm$ SD       | AVG $\pm$ SD       |
| <i>Organic acids</i>   |                    |                     |                    |                    |
| Acetic acid            | 10.94 $\pm$ 0.90   | 17.75 $\pm$ 1.59    | 10.06 $\pm$ 0.02   | 12.30 $\pm$ 1.65   |
| Citric Acid            | 24.89 $\pm$ 6.31   | 29.58 $\pm$ 4.52    | 26.55 $\pm$ 2.69   | 37.18 $\pm$ 8.16   |
| Formic acid            | 2.34 $\pm$ 0.37    | 1.91 $\pm$ 0.26     | 1.34 $\pm$ 0.04    | 1.27 $\pm$ 0.15    |
| Fumaric Acid           | 2.90 $\pm$ 0.79    | 0.95 $\pm$ 0.10     | 1.61 $\pm$ 0.02    | 1.79 $\pm$ 0.81    |
| Malic acid             | 307.48 $\pm$ 26.51 | 281.75 $\pm$ 8.47   | 263.10 $\pm$ 6.87  | 279.13 $\pm$ 20.90 |
| <i>Amino acids</i>     |                    |                     |                    |                    |
| Alanine                | 42.85 $\pm$ 7.45   | 43.92 $\pm$ 1.15    | 35.38 $\pm$ 1.69   | 59.32 $\pm$ 21.63  |
| Asparagine             | 64.41 $\pm$ 0.90   | 74.77 $\pm$ 3.33    | 57.59 $\pm$ 0.44   | 59.10 $\pm$ 3.57   |
| Aspartic acid          | 15.42 $\pm$ 2.12   | 24.66 $\pm$ 1.67    | 18.96 $\pm$ 1.29   | 23.35 $\pm$ 1.94   |
| GABA                   | 18.62 $\pm$ 4.10   | 21.69 $\pm$ 1.70    | 20.48 $\pm$ 1.03   | 25.15 $\pm$ 1.78   |
| Glutamic acid          | 70.58 $\pm$ 17.91  | 107.06 $\pm$ 9.76   | 81.79 $\pm$ 11.64  | 87.82 $\pm$ 18.61  |
| Glutamine              | 134.70 $\pm$ 6.92  | 157.13 $\pm$ 11.21  | 120.22 $\pm$ 14.76 | 216.60 $\pm$ 57.79 |
| Isoleucine             | 26.61 $\pm$ 0.87   | 27.06 $\pm$ 1.96    | 23.39 $\pm$ 0.97   | 23.56 $\pm$ 4.07   |
| Leucine                | 18.94 $\pm$ 0.48   | 19.53 $\pm$ 1.13    | 16.12 $\pm$ 0.66   | 16.69 $\pm$ 2.29   |
| Phenylalanine          | 5.99 $\pm$ 0.19    | 4.87 $\pm$ 0.78     | 3.97 $\pm$ 0.15    | 3.56 $\pm$ 0.35    |
| Threonine              | 24.86 $\pm$ 1.01   | 27.82 $\pm$ 0.07    | 21.58 $\pm$ 0.01   | 23.02 $\pm$ 2.33   |
| Tryptophan             | 4.91 $\pm$ 0.30    | 2.50 $\pm$ 0.56     | 2.81 $\pm$ 0.39    | 1.32 $\pm$ 0.29    |
| Tyrosine               | 6.99 $\pm$ 0.43    | 3.95 $\pm$ 0.71     | 4.77 $\pm$ 0.68    | 3.63 $\pm$ 0.37    |
| Valine                 | 14.25 $\pm$ 0.03   | 14.70 $\pm$ 0.78    | 11.96 $\pm$ 0.34   | 13.55 $\pm$ 2.18   |
| <i>Carbohydrates</i>   |                    |                     |                    |                    |
| $\alpha$ -Glucose      | 499.68 $\pm$ 15.12 | 538.54 $\pm$ 24.02  | 438.73 $\pm$ 1.55  | 437.76 $\pm$ 44.95 |
| $\beta$ -Glucose       | 822.37 $\pm$ 23.84 | 887.30 $\pm$ 38.88  | 721.72 $\pm$ 0.94  | 721.22 $\pm$ 78.10 |
| Fructose               | 455.43 $\pm$ 38.89 | 490.97 $\pm$ 40.03  | 345.82 $\pm$ 17.26 | 444.27 $\pm$ 38.10 |
| Myo-Inositol           | 903.42 $\pm$ 25.24 | 1006.79 $\pm$ 32.33 | 796.19 $\pm$ 7.07  | 814.37 $\pm$ 75.36 |
| Sucrose                | 364.62 $\pm$ 32.72 | 407.41 $\pm$ 17.00  | 306.03 $\pm$ 25.06 | 228.88 $\pm$ 38.64 |
| <i>Nucleosides</i>     |                    |                     |                    |                    |
| Adenosine              | 2.56 $\pm$ 0.76    | 3.04 $\pm$ 0.65     | 2.52 $\pm$ 0.39    | 3.14 $\pm$ 0.77    |
| Cytidine               | 3.56 $\pm$ 0.92    | 2.58 $\pm$ 0.87     | 2.31 $\pm$ 0.37    | 2.87 $\pm$ 0.93    |
| Guanosine              | 1.55 $\pm$ 0.12    | 0.91 $\pm$ 0.17     | 0.58 $\pm$ 0.23    | 0.25 $\pm$ 0.26    |
| Uracil                 | 3.53 $\pm$ 0.13    | 1.95 $\pm$ 0.08     | 1.71 $\pm$ 0.06    | 0.48 $\pm$ 0.24    |
| <i>Other compounds</i> |                    |                     |                    |                    |
| Chicoric Acid          | 19.12 $\pm$ 5.09   | 24.84 $\pm$ 1.42    | 18.82 $\pm$ 0.56   | 5.07 $\pm$ 4.14    |
| Chlorogenic acid       | 8.89 $\pm$ 2.54    | 5.01 $\pm$ 1.64     | 6.48 $\pm$ 0.25    | 1.88 $\pm$ 1.54    |
| Choline                | 21.36 $\pm$ 4.35   | 26.67 $\pm$ 1.97    | 22.22 $\pm$ 1.55   | 31.59 $\pm$ 6.30   |
| Ethanolamine           | 12.46 $\pm$ 2.03   | 24.73 $\pm$ 1.72    | 17.96 $\pm$ 0.26   | 24.23 $\pm$ 1.16   |
| Trigonelline           | 2.92 $\pm$ 0.20    | 2.38 $\pm$ 0.04     | 2.23 $\pm$ 0.23    | 1.65 $\pm$ 0.14    |
